# Supplementary material for: Lipid Nanocarriers-Loaded Nanocomposite as a Suitable Platform to Release Antibacterial and Antioxidant Agents for Immediate Dental Implant Placement Restorative Treatment
Source: MDPI journal article supplement (doi:10.3390/pharmaceutics13122072), 2021-12-03
Supplement: s1 [file s1]

# Supplementary Materials: Lipid Nanocarriers-Loaded Nanocomposite as a Suitable Platform to Release Antibacterial and Antioxidant Agents for Immediate Dental Implant Placement Restorative Treatment

Giuseppe Angellotti, Alessandro Presentato, Denise Murgia, Giulia Di Prima, Fabio D'Agostino, Maria Cristina D'Oca, Amalia Giulia Scarpaci, Rosa Alduina, Giuseppina Campisi and Viviana De Caro

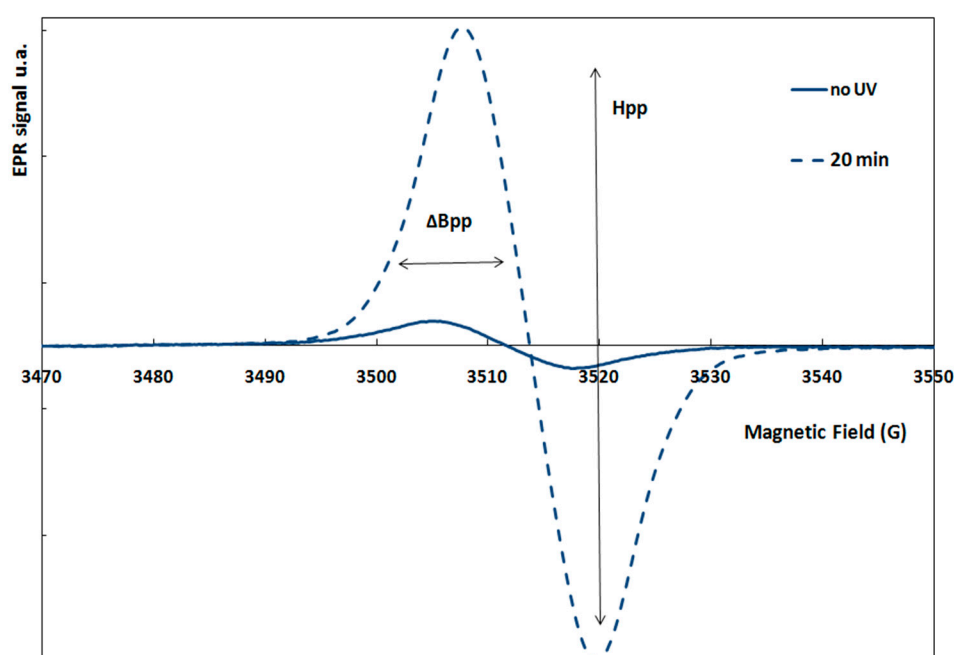

**Figure S1.** EPR spectra of QRC not irradiated (continuous line) and UV irradiated (50 W) for 20 min (dashed line). The  $H_{pp}$  and  $\Delta B_{pp}$  parameters are shown.

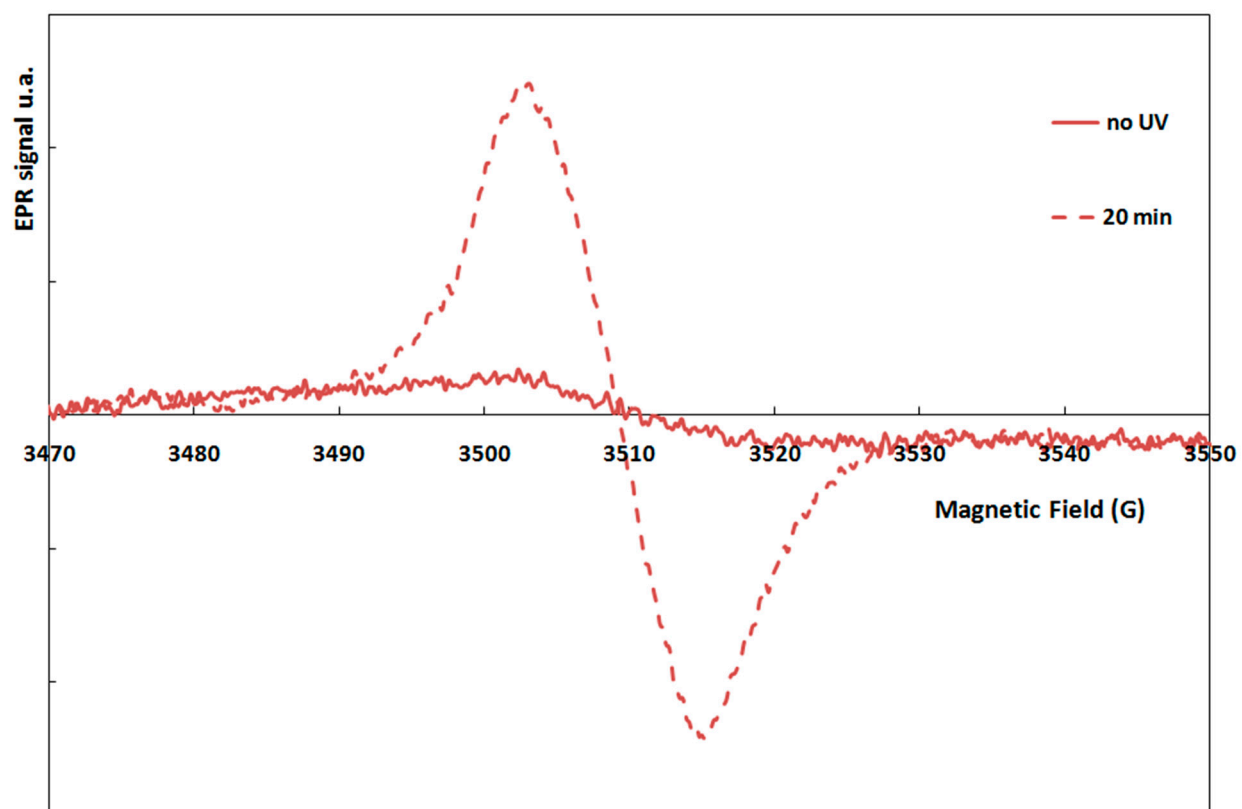

**Figure S2.** EPR spectra of BioQ-CPX not irradiated (continuous line) and UV irradiated (50 W) for 20 min (dashed line).
